# Supplementary material
Source: PubMed Central journal article supplement (PMC5777260)
Supplement: 10.1074_M117.813139_jbc.M117.813139-1.pdf [file 10.1074_M117.813139_jbc.M117.813139-1.pdf]

# Supplemental Data

## Heterologous phosphorylation-induced formation of a stability lock permits regulation of inactive receptors by $\beta$ -arrestins

András D. Tóth<sup>‡,1</sup>, Susanne Prokop<sup>‡,1</sup>, Pál Gyombolai<sup>‡,§</sup>, Péter Várnai<sup>‡,§</sup>, András Balla<sup>‡,§</sup>, Vsevolod V. Gurevich<sup>¶</sup>, László Hunyady<sup>‡,§,2</sup>, Gábor Turu<sup>‡,§</sup>

From the <sup>‡</sup>Department of Physiology, Faculty of Medicine, Semmelweis University, Budapest, Hungary,

the <sup>§</sup>MTA-SE Laboratory of Molecular Physiology, Hungarian Academy of Sciences and Semmelweis University, Budapest, Hungary,

and the <sup>¶</sup>Department of Pharmacology, Vanderbilt University, Nashville, TN, USA

<sup>1</sup> These authors contributed equally to this work.

<sup>2</sup> To whom correspondence should be addressed: László Hunyady, Address: Department of Physiology, Faculty of Medicine, Semmelweis University, H-1428 Budapest, P.O. Box 2, Hungary. Tel.: +36 1 266

9180; fax: +36 1 266 6504. Electronic address: hunyady.laszlo@med.semmelweis-univ.hu

Running title: Heterologous regulation of inactive receptors via  $\beta$ -arrestin

Included figure supplements:

Figure S1

Figure S2

Figure S3

Figure S4

Figure S5

## Figure S1

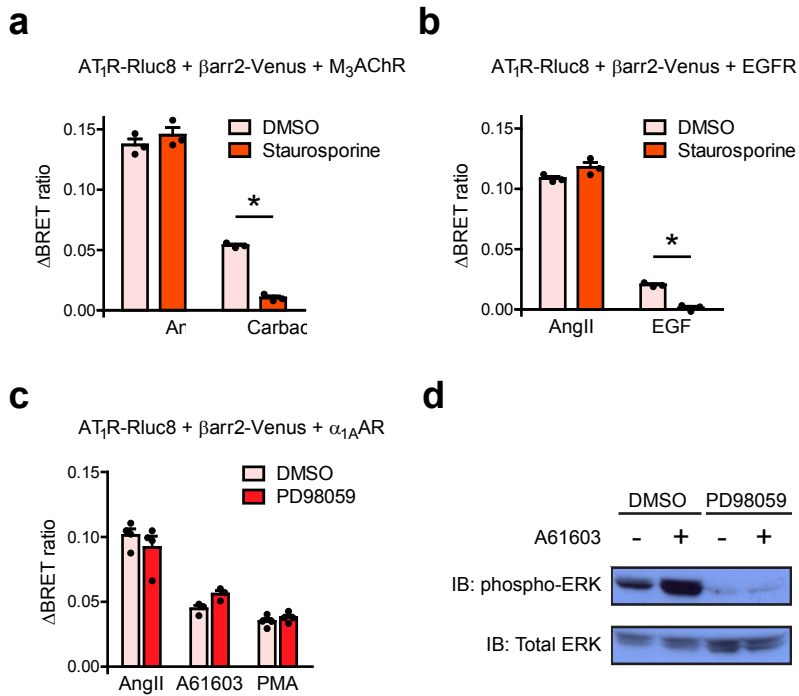

### Figure S1. Stimulation of a G<sub>q/11</sub>-coupled receptor or EGFR induces PKC-dependent binding between AT<sub>1</sub>R and β-arrestin2

**a** and **b**, Intermolecular BRET was measured in cells co-expressing AT<sub>1</sub>R-Rluc8, β-arrestin2-Venus and M<sub>3</sub>AChR (**a**) or EGFR (**b**), as indicated. After 30-minute pretreatment with vehicle (DMSO) or 500 nM staurosporine, the cells were stimulated with 100 nM AngII, (**a-b**) 10 μM carbachol (**a**) or 100 ng/ml EGF (**b**).

**c**, Cells co-expressing AT<sub>1</sub>R-Rluc8, β-arrestin2-Venus and untagged α<sub>1A</sub>AR were pretreated with vehicle (DMSO) or MEK1 inhibitor PD98059 (100 μM) and stimulated with AngII, 100 nM PMA or α<sub>1A</sub>AR specific agonist A61603 (1 μM), and intermolecular BRET was measured. The average BRET ratio changes are presented in scatter dot plots with columns (mean+s.e.m.) of independent biological replicates (*n*=3-4). \*, *P*<0.05, pretreatment significantly inhibits the effect of the stimulus, as revealed by Two-Way ANOVA.

**d**, Immunoblot analysis of ERK phosphorylation. The day before transfection HEK 293T cells were plated on poly-L-lysine coated 6-well plates. The cells were transfected with cDNA encoding α<sub>1A</sub>AR. 24 hours later, the cells were serum-starved for 2 hours, pretreated with DMSO or 100 μM PD98059 for 30 minutes, then stimulated with 1 μM A61603 for 5 minutes. Representative blots of 3 independent experiments are shown.

## Figure S2

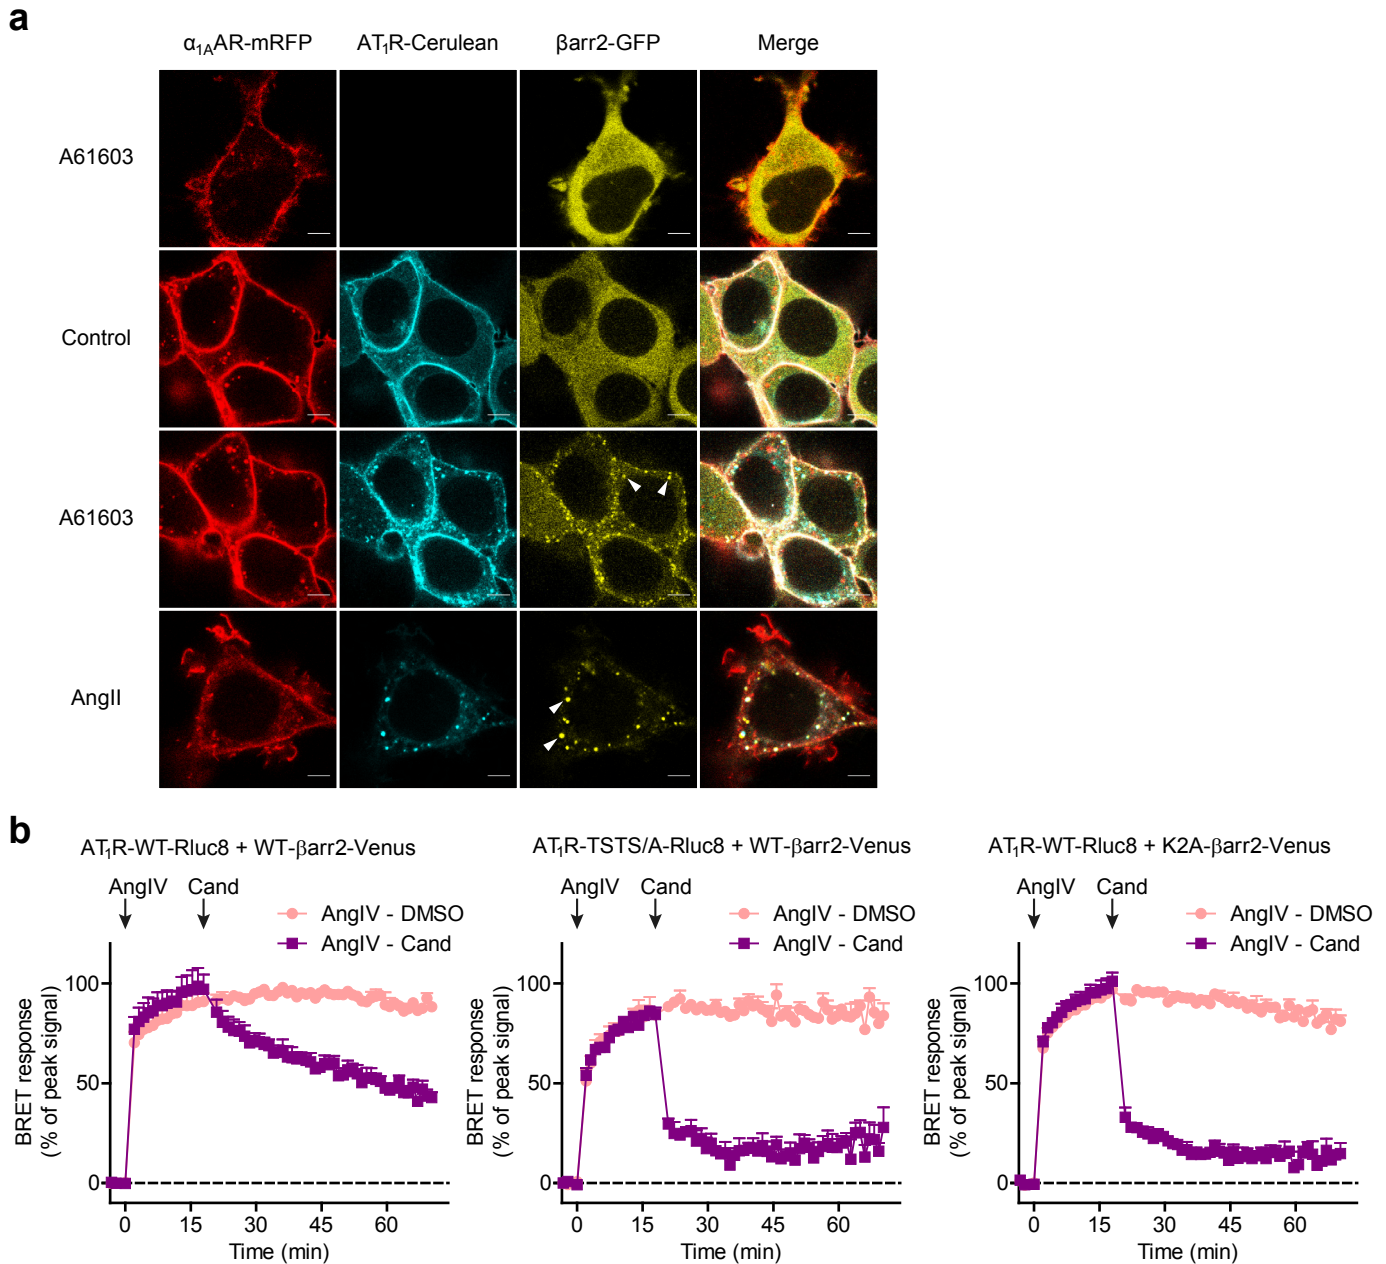

**Figure S2.**

**a,  $\alpha_{1A}AR$  activation triggers  $\beta$ -arrestin2 recruitment to AT<sub>1</sub>R, followed by their co-internalization**

HEK 293T cells co-expressing  $\alpha_{1A}AR$ -mRFP,  $\beta$ -arrestin2-GFP with or without (top) AT<sub>1</sub>R-Cerulean were visualized with confocal microscope. Images were taken before (control) and after 20 minutes of stimulation with 1  $\mu$ M  $\alpha_{1A}AR$  agonist A61603 or AngII, fluorescence was recorded by confocal microscopy. Representative images from 3 independent experiments are shown. Arrowheads mark endosomal-localized  $\beta$ -arrestin2-GFP, which were present after A61603 treatment only in the case of AT<sub>1</sub>R-Cerulean co-expression (third row). Scale bars represent 5  $\mu$ m.

**b, Disruption of the stabilization lock accelerates the  $\beta$ -arrestin2 dissociation from inactive AT<sub>1</sub>R**

Cells were co-transfected with WT or TSTS/A-mutant AT<sub>1</sub>R-Rluc8 and WT- or K2A- $\beta$ -arrestin2-Venus, as indicated, and with dominant-negative dynamin to inhibit receptor internalization.  $\beta$ -arrestin2 binding to AT<sub>1</sub>R was monitored using BRET. The interaction was induced with 10  $\mu$ M low-affinity agonist angiotensin IV (AngIV) treatment, then AngIV was displaced by addition of 10  $\mu$ M high-affinity competitive antagonist candesartan (Cand). BRET ratio dropped faster in the case of TSTS/A- and K2A-mutations, showing that the stability of the interaction is decreased in the absence of stability lock formation. Values are presented as percentage of the peak AngIV-induced signal in each experiment and each set-up as mean+s.e.m. of 3 independent biological replicates, each experiment was performed in duplicate.

**Figure S3**

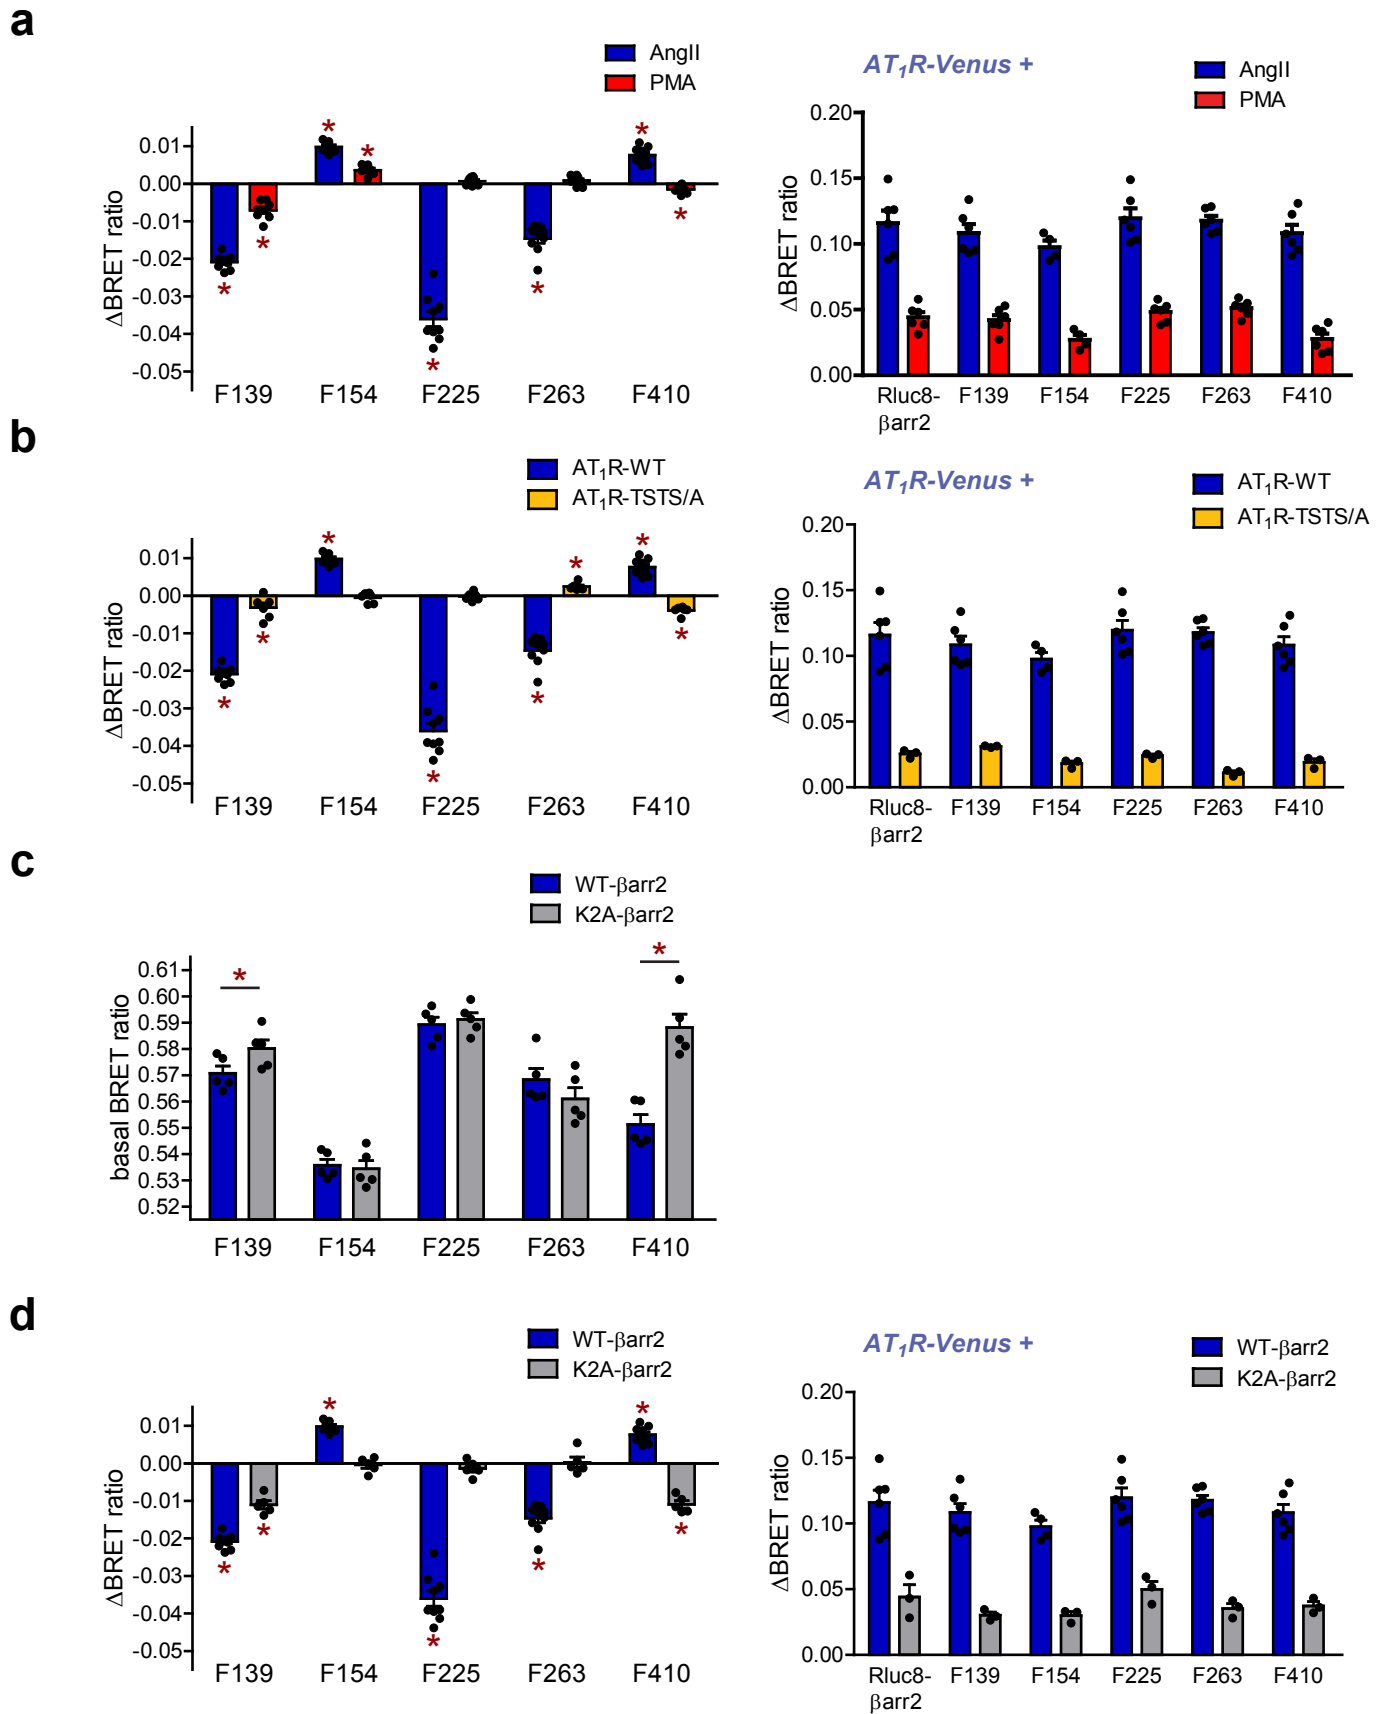

Figure S3 continued on next page

Figure S3 continued

**Figure S3. Intra- and intermolecular BRET signals detected with FIAsh biosensors**

**a,b,d left panels**, Stimulus-induced intramolecular (conformational) BRET changes of FIAsh dye-labelled biosensors were detected in cells co-expressing wild type untagged AT<sub>1</sub>R and wild type biosensors (**a**), AT<sub>1</sub>R-TSTS/A and wild type biosensors (**b**), or wild type AT<sub>1</sub>R and FIAsh biosensors harboring K2A mutation (**d**).

**a,b,d right panels**, Intermolecular (interactional) BRET changes between AT<sub>1</sub>R-Venus and FIAsh biosensors (**a**), AT<sub>1</sub>R-TSTS/A-Venus and wild type sensors (**b**), AT<sub>1</sub>R-Venus und K2A-mutant FIAsh biosensors (**c**). AngII (**a,b,c**) or PMA (**a**) were used as stimuli. Average BRET ratio changes are shown in scatter dot plots with columns (mean+s.e.m.) of independent biological replicates,  $n=5-10$  (the exact  $n$  values are presented in the figure legends of Fig. 3 and 4). \*,  $P<0.05$ , significant difference compared to vehicle-stimulated control, analyzed with paired two-tailed two-sample  $t$ -test. There was no significant difference in the recruitment of Rluc8- $\beta$ -arrestin2 and the FIAsh sensors to AT<sub>1</sub>R upon AngII treatment (analyzed with One-Way ANOVA with Bonferroni post hoc-test).

**c**, Basal intramolecular (conformational) BRET ratios measured in cells co-expressing untagged AT<sub>1</sub>R and wild type or K2A-mutant FIAsh biosensors labelled with FIAsh dye.  $n=5$ , scatter dot plots with columns (mean+s.e.m.) are presented, \*,  $P<0.05$ , analyzed with One-Way ANOVA (repeated measures) with Bonferroni post hoc-test.

## Figure S4

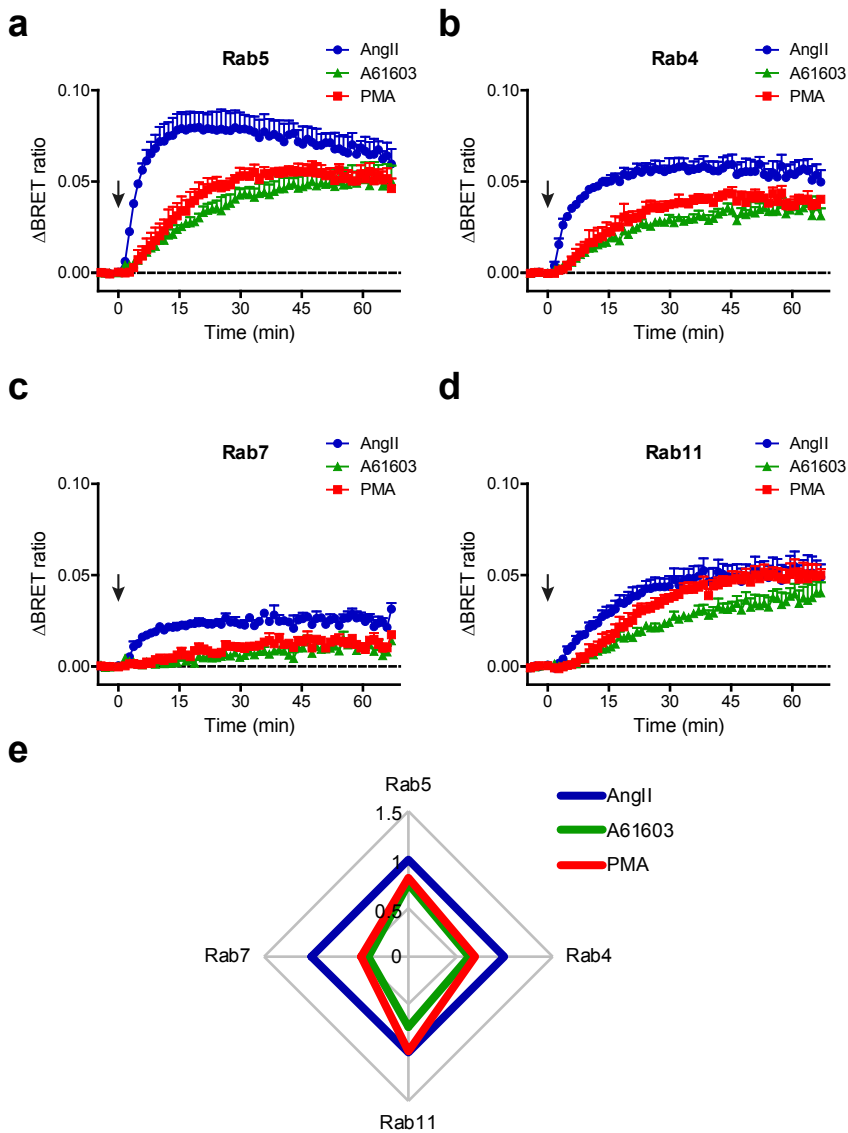

### Figure S4. Stimulation of $\alpha_{1A}$ AR induces distinct intracellular redistribution of AT<sub>1</sub>R

Cells were co-transfected with plasmids encoding AT<sub>1</sub>R-Rluc8, Venus-tagged Rab construct (a, Rab5; b, Rab4; c, Rab7; d, Rab11), untagged  $\alpha_{1A}$ AR and untagged  $\beta$ -arrestin2. AT<sub>1</sub>R agonist AngII, PKC-activator PMA, or  $\alpha_{1A}$ AR agonist A61603 were used as stimuli. The kinetics of BRET ratio changes are shown as mean+s.e.m in a-d panels. e, Patterns of intracellular redistribution of AT<sub>1</sub>R. BRET ratio changes after 60 $\pm$ 2-minute stimulation were normalized to the AngII-induced changes, and the values are shown in radial diagram.  $\alpha_{1A}$ AR stimulation and PMA treatment induced similar patterns of BRET ratio changes, which are distinct from that of AngII.

## Figure S5

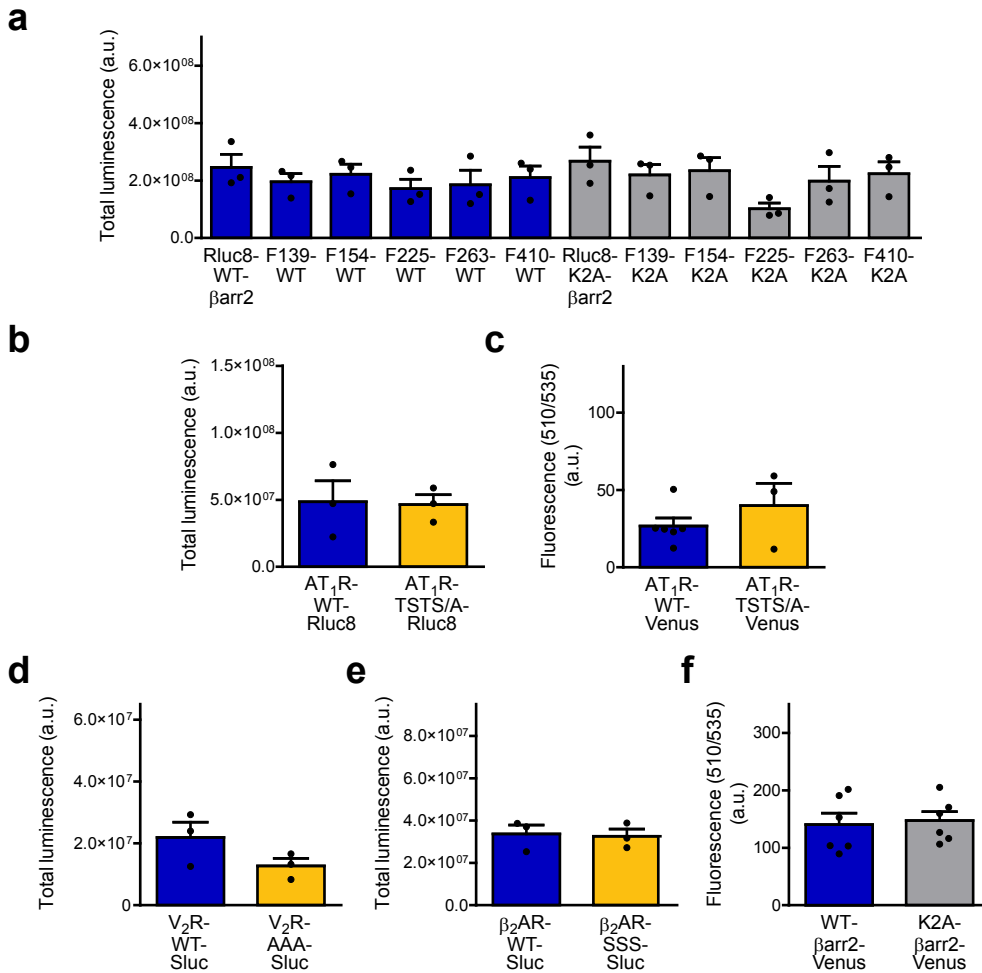

### Figure S5. Expression levels of the wild type and mutant BRET constructs used in this study

**a**, Expression of the FAsH-BRET β-arrestin2 biosensors. Total luminescence was determined before stimulation in AT<sub>1</sub>R-Venus and biosensor co-expressing cells. There was no significant difference in the luminescence of the biosensors compared to Rluc8-WT-β-arrestin2, analyzed with One-Way ANOVA (repeated measures) with Bonferroni post hoc-test. ( $n=3$ , biological replicates).

**b,d,e**, Expression of the donor-tagged mutant receptors. Cells were transfected with wild type or mutant AT<sub>1</sub>R-Rluc8 (**b**), V<sub>2</sub>R-Sluc (**d**) and β<sub>2</sub>AR-Sluc (**e**), as indicated, and total luminescence was measured. ( $n=3$ , experiments were performed in quadruplicate).

**c,f**, Expression of the acceptor-tagged wild type and mutant AT<sub>1</sub>R and β-arrestin2. The fluorescence of wild type and TSTS/A mutant AT<sub>1</sub>R-Venus was measured in receptor and wild type FAsH-BRET β-arrestin2 biosensor co-expressing cells (**c**) ( $n=6$  and  $n=3$ , respectively, biological replicates). The β-arrestin2-Venus fluorescence was measured in β<sub>2</sub>AR-Sluc (WT and SSS mutant,  $n=3-3$ , respectively) co-expressing cells (data from Figure 4b, left panel) (**f**). Scatter dot plots with columns (mean+s.e.m.) are shown. There was no significant difference in the expression of the wild type and mutant proteins, analyzed with Student's two-sample t-test.
